# Supplementary material
Source: HighWire-hosted journal article supplement (https://ez-admanager.com/highwire/filestream/133641/field_highwire_adjunct_files/0/Appendices_e-1-5.pdf)
Supplement: Appendices_e-1-5.pdf [file Appendices_e-1-5.pdf]

## **Appendices e-1 through e-5**

### **Appendix e-1: 2011–2013 Guideline Development Subcommittee (GDS) Members**

John D. England, MD, FAAN (Chair); Cynthia Harden, MD (Vice-Chair); Melissa Armstrong, MD; Eric Ashman, MD; Misha-Miroslav Backonja, MD; Richard L. Barbano, MD, PhD, FAAN; Diane Donley, MD; Terry Fife, MD, FAAN; David Gloss, MD; John J. Halperin, MD, FAAN; Cheryl Jaigobin, MD; Andres M. Kanner, MD; Jason Lazarou, MD; Steven R. Messé, MD, FAAN; David Michelson, MD; Pushpa Narayanaswami, MD, MBBS; Anne Louise Oaklander, MD, PhD, FAAN; Tamara Pringsheim, MD; Alexander Rae-Grant, MD; Michael Shevell, MD, FAAN; Theresa A. Zesiewicz, MD, FAAN; Jonathan P. Hosey, MD, FAAN (Ex-Officio); Stephen Ashwal, MD, FAAN (Ex-Officio); Deborah Hirtz, MD, FAAN (Ex-Officio)

## **Appendix e-2: Mission Statement of GDS**

The mission of the GDS is to prioritize, develop, and publish evidence-based guidelines related to the diagnosis, treatment, and prognosis of neurological disorders.

The GDS is committed to using the most rigorous methods available within our budget, in collaboration with other available AAN resources, to most efficiently accomplish this mission.

### Appendix e-3: Ovid MEDLINE Complete Search Strategy

Database: Ovid MEDLINE(R) <1950 to September Week 3 2007>

#### Search Strategy:

- 
- 1 (tardive syndrome\$1 or tardive dyskinesia\$1 or tardive tremor\$1).mp. (3300)
  - 2 (tardive dystonia or tardive tourettism or tardive stereotypy or tardive myoclonus or classical tardive dyskinesia or tardive tic\$1).mp. (215)
  - 3 (medication-induced movement disorder\$1 or drug-induced movement disorder\$1 or neuroleptic-induced movement disorder\$1).tw. (128)
  - 4 or/1-3 (3507)
  - 5 (neuroleptic discontinuation or neuroleptic cessation or reversibility or switching antipsychotic\$1).tw. (8301)
  - 6 tranquilizing agents/ or exp antipsychotic agents/ or chlorpromazine/ or clozapine/ or haloperidol/ or molindone/ or reserpine/ or risperidone/ or sulpiride/ or tiapride/ (95571)
  - 7 (typical antipsychotic? or haloperidol or chlorpromazine or fluperlapine or sulpiride or thiopropazate or molindole or tiapride or clozapine or risperidone or olanzapine or quetiapine or sertindole or aripiprazole or ziprasidone or zuclopenthixol or tetrabenazine or reserpine).mp. (61838)
  - 8 indoles/ or amides/ or benzamides/ or Dibenzazepines/ (49194)
  - 9 Clopenthixol/ or Tetrabenazine/ or methyltyrosines/ or alpha-methyltyrosine/ or Methyldopa/ or ergot alkaloids/ or bromocriptine/ or Pergolide/ or piperazines/ or piribedil/ or dihydroxyphenylalanine/ or levodopa/ or Propranolol/ (87333)

- 10 (alpha-methyl-para-tyrosine or alpha-methyldopa or bromocriptine or pergolide or piribedil or pramipexole or ropinirole or levodopa or propranolol).mp. (23034)
- 11 (donepezil or rivastigmine or galantamine or tacrine or memantine or Deanol or gaba agonist? or baclofen or clonazepam or diazepam or valproate or benzodiazepine? or Biperiden).mp. (62434)
- 12 Pyrimidines/ or imidazoles/ or ondansetron/ or ONDANSETRON (nm) or morphinans/ or naloxone/ (68639)
- 13 (vitamin E or alpha-tocopherol or eicosapentaenoic acid or selegiline or melatonin or branched chain amino acid\$1 or amantadine or calcium channel antagonist\$1 or nifedipine or verapamil or diltiazem or buspirone or nefazadone or ondansetron or naloxone).mp. (123401)
- 14 Morphine/ or peptides/ or caerulein/ or Lithium/ or exp Estrogens/ or acetamides/ or piracetam/ or Pallidotomy/ or Globus Pallidus/su or electric stimulation therapy/ or deep brain stimulation/ or "Biofeedback (Psychology)"/ or Electroconvulsive Therapy/ (242602)
- 15 exp Cholinergic Antagonists/ or adrenal cortex hormones/ or exp glucocorticoids/ or exp hydroxycorticosteroids/ (321611)
- 16 Galantamine/ or acridines/ or tacrine/ or amantadine/ or memantine/ or Deanol/ or exp gaba agonists/ or benzodiazepinones/ or clonazepam/ or diazepam/ or valerates/ or valproic acid/ or benzazepines/ or benzodiazepines/ or Biperiden/ (64420)
- 17 adrenal cortex hormones/ or exp glucocorticoids/ or exp hydroxycorticosteroids/ (257110)
- 18 (anticholinergic? or corticosteroid? or Morphine or caerulein or cerulein or Lithium or Estrogen or oestrogen or levetiracetam or piracetam or Pallidotomy or thalamotomy or deep brain stimulation or Biofeedback or Electroconvulsive Therap\$3).mp. (233668)

- 19 exp vitamin E/ or Eicosapentaenoic Acid/ or fatty acids/ or fatty acids, unsaturated/ or phenethylamines/ or selegiline/ or Melatonin/ or Amantadine/ or exp calcium channel blockers/ or diltiazem/ or nifedipine/ or verapamil/ or spiro compounds/ or buspirone/ (173780)
- 20 exp botulinum toxins/ or (Botulinum Toxin Type B or botulinum toxin B).tw. or exp Amino Acids, Branched-Chain/ or meclofenozate.mp. (48623)
- 21 or/5-20 (1194936)
- 22 and/4,21 (2899)
- 23 case series.mp. (12974)
- 24 n=2:.ab. (35797)
- 25 epidemiologic methods/ or case-control studies/ or retrospective studies/ or exp cohort studies/ or clinical trials/ or randomized controlled trials/ or meta-analysis/ or Research/ or "review [publication type]"/ (2483095)
- 26 and/23-24 (62)
- 27 or/25-26 (2483116)
- 28 and/22,27 (925)

## Appendix e-4: EMBASE Complete Search Strategy

Database: EMBASE <1980 to 2007 Week 40>

Search Strategy:

- 
- 1 Tardive Dyskinesia/ (4912)
  - 2 (tardive syndrome\$1 or tardive dyskinesia\$1 or tardive tremor\$1).tw. (2898)
  - 3 (tardive dystonia or tardive tourettism or tardive stereotypy or tardive myoclonus or classical tardive dyskinesia or tardive tic\$1).tw. (218)
  - 4 (medication-induced movement disorder\$1 or drug-induced movement disorder\$1 or neuroleptic-induced movement disorder\$1).tw. (124)
  - 5 or/1-4 (5410)
  - 6 (neuroleptic discontinuation or neuroleptic cessation or reversibility or switching antipsychotic\$1 or switching neuroleptic\$1).tw. (7048)
  - 7 exp Neuroleptic Agent/ (117134)
  - 8 (typical antipsychotic\$1 or haloperidol or chlorpromazine or fluperlapine or sulpiride or thiopropazate or molindone or tiapride).mp. (53587)
  - 9 aripiprazole/ or clozapine/ or fluperlapine/ or olanzapine/ or quetiapine/ or risperidone/ or sertindole/ or sulpiride/ or tiapride/ or ziprasidone/ (33409)
  - 10 (aripiprazole or clozapine or olanzapine or quetiapine or risperidone or sertindole or ziprasidone or zuclopenthixol or tetrabenazine).mp. (28532)
  - 11 Tetrabenazine/ or Metirosine/ or Methyldopa/ or bromocriptine/ or levodopa/ or pergolide/ or pramipexole/ or ropinirole/ or Propranolol/ (93058)
  - 12 (reserpine or alpha-methyl-para tyrosine or alpha-Methyldopa or bromocriptine or levodopa or pergolide or pramipexole or ropinirole or Propranolol or piribedil).mp. (99123)

- 13 Piribedil/ or exp Cholinergic Receptor Blocking Agent/ or donepezil/ or galantamine/ or rivastigmine/ or tacrine/ (89190)
- 14 (anticholinergic\$1 or donepezil or galantamine or rivastigmine or tacrine).mp. (15960)
- 15 Memantine/ or 4 aminobutyric acid receptor stimulating agent/ or Valproic Acid/ or baclofen/ or deanol/ or meclofenoxate/ or benzodiazepine/ or clonazepam/ or diazepam/ (86155)
- 16 (Memantine or GABA agonist\$1 or valproate or baclofen or deanol or meclofeno?ate or benzodiazepine or clonazepam or diazepam or biperiden).mp. (97815)
- 17 Alpha Tocopherol/ or Icosapentaenoic Acid/ or Selegiline/ or Melatonin/ or exp Branched Chain Amino Acid/ or Amantadine/ or exp Calcium Channel Blocking Agent/ or Buspirone/ (201102)
- 18 (Alpha Tocopherol or vitamin E or Icosapentaenoic Acid or eicosapentaenoic acid or Selegiline or Melatonin or Branched Chain Amino Acid\$1 or Amantadine or Calcium Channel Blocking Agent\$1 or calcium channel antagonist\$1 or Buspirone or nifedipine or verapamil or diltiazem).mp. (159207)
- 19 Nefazodone/ or Ondansetron/ or Naloxone/ or Morphine/ or Ceruletide/ or exp Corticosteroid/ or Lithium/ or exp Estrogen/ or etiracetam/ or piracetam/ or Botulinum Toxin/ (551631)
- 20 (Nefazodone or Ondansetron or Naloxone or Morphine or cerulein or Ceruletide or Corticosteroid\$1 or Lithium or Estrogen or oestrogen or levetiracetam or piracetam or Botulinum Toxin\$1 or botulinum toxin A or botulinum toxin B).mp. (341347)
- 21 pallidotomy/ or thalamotomy/ or brain depth stimulation/ or exp feedback system/ or electroconvulsive therapy/ (42000)

22 (pallidotomy or thalamotomy or deep brain stimulation or biofeedback or electroconvulsive therapy).tw. (8797)

23 or/6-22 (1081351)

24 and/5,23 (4847)

25 limit 24 to (human and english language and (article or "review")) (2805)

26 limit 24 to (human and english language and (conference paper or editorial or letter or note or proceeding or short survey)) (756)

27 25 not 26 (2805)

28 case study/ (5105)

29 n=2:.ab. (37150)

30 longitudinal study/ or prospective study/ or retrospective study/ or case control study/ or randomized controlled trial/ or cohort analysis/ or meta analysis/ or "systematic review"/ (381877)

31 "Review"/ or follow up/ (1062057)

32 and/28-29 (9)

33 random:.mp. (387161)

34 or/30-33 (1547667)

35 and/24,34 (1755)

36 limit 35 to (human and english language) (1553)

37 or/25,36 (2893)

38 limit 24 to (human and english language and "review") (1175)

39 or/36,38 (1597)

40 37 not 39 (1296)



- 41 Tardive Dyskinesia/su, dt, th [Surgery, Drug Therapy, Therapy] (656)
- 42 or/2-4,41 (3284)
- 43 and/23,42 (2863)
- 44 limit 43 to (human and english language and "review") (420)
- 45 limit 24 to (human and english language and "treatment (2 or more terms min difference)")  
(660)
- 46 or/36,38,45 (1780)
- 47 limit 46 to (human and english language and (book or conference paper or editorial or  
erratum or letter or note or proceeding or report or short survey)) (108)
- 48 46 not 47 (1672)
- 49 limit 43 to (human and english language and "treatment (2 or more terms min difference)")  
(310)
- 50 and/34,43 (753)
- 51 limit 50 to (human and english language) (628)
- 52 or/44,49,51 (782)
- 53 limit 52 to (conference paper or editorial or letter or note or proceeding or report or short  
survey) (41)
- 54 52 not 53 (741)

## Appendix e-5: PsycINFO Complete Search Strategy

Database: PsycINFO <1967 to October Week 2 2007>

### Search Strategy:

---

- 1 tardive dyskinesia/ (1275)
- 2 (tardive dyskinesia\$1 or tardive syndrome\$1 or tardive tremor\$1 or tardive dystonia or tardive tourettism or tardive stereotypy or tardive myoclonus or classical tardive dyskinesia\$1).tw. (2423)
- 3 (neuroleptic-induced movement disorder\$1 or drug-induced movement disorder\$1 or medication-induced movement disorder\$1).tw. (103)
- 4 or/1-3 (2521)
- 5 (neuroleptic discontinuation or neuroleptic cessation or reversibility or switching antipsychotic\$1 or switching neuroleptic\$1).tw. (704)
- 6 (sertindole or haloperidol or chlorpromazine or clozapine or molindone or olanzapine or quetiapine or risperidone or sulpiride or tetrabenazine or fluperlapine or thiopropazate or tiapride).mp. (16468)
- 7 (aripiprazole or ziprasidone or zuclopenthixol or reserpine or reserpine).mp. or reserpine/ (1626)
- 8 alpha methylparatyrosine/ or bromocriptine/ or levodopa/ or propranolol/ or (alpha-methyl-para-tyrosine or alpha methyl-dopa or bromocriptine or pergolide or piribedil or levodopa or propranolol or pramipexole or ropinirole).mp. (3814)
- 9 haloperidol/ or chlorpromazine/ or exp neuroleptic drugs/ (20975)

- 10 (donepezil or anticholinergic\$1 or rivastigmine or tacrine or galanthamine).mp. or exp cholinergic blocking drugs/ or galanthamine/ (10628)
- 11 (memantine or deanol or meclofenozate or GABA agonist\$1 or clonazepam or diazepam or valproate or baclofen or benzodiazepine\$1 or biperiden or VITAMIN E or alpha-tocopherol or eicosapentaenoic acid or selegiline or melatonin).mp. or antidepressant drugs/ or exp gamma aminobutyric acid agonists/ or valproic acid/ or baclofen/ or exp benzodiazepines/ or melatonin/ (27230)
- 12 (branched chain amino acid\$1 or amantadine or calcium channel blocker\$1 or calcium channel antagonist\$1 or nifedipine or verapamil or diltiazem or buspirone or nefazodone or naloxone or morphine or cerulein or ceruletide or corticosteroid\$1 or lithium or estrogen or oestrogen).mp. or amantadine/ or channel blockers/ or verapamil/ or buspirone/ or nefazodone/ or naloxone/ or morphine/ or exp corticosteroids/ or exp lithium/ or exp estrogens/ (30122)
- 13 (LEVETIRACETAM or piracetam or botulinum toxin\$1 or botulinum toxin A or botulinum toxin B or pallidotomy or thalamotomy or deep brain stimulation or biofeedback or electroconvulsive therapy).mp. or piracetam/ or thalamotomy/ or exp biofeedback/ or electroconvulsive shock therapy/ (10537)
- 14 or/5-13 (94609)
- 15 and/4,13 (68)
- 16 limit 15 to (human and english language and yr="1970 - 2007") (65)
- 17 limit 16 to ("0200 book" or "0240 authored book" or "0280 edited book" or "0300 encyclopedia" or "0400 dissertation abstract") (6)
- 18 16 not 17 (59)
